# Supplementary material for: Institute collection and analysis of Nanobodies (iCAN): a comprehensive database and analysis platform for nanobodies
Source: PubMed Central journal article supplement (PMC5646159; doi:10.1186/s12864-017-4204-6), 2017-10-17
Supplement: 12864_2017_4204_MOESM2_ESM.pdf [file 12864_2017_4204_MOESM2_ESM.pdf]

**iCAN**  
Institute Collection & Analysis of Nanobody

Home Search Analysis Submit Structure Prediction Help About Us

**Source Organism**

Lama glama

Vicugna pacos

Camelus dromedarius

**Resolution**

0-1Å

1-2Å

2-3Å

3-4Å

**Function**

Crystallization aids

Basic research

Probes

Clinical application

Food testing

Protein design

Items per page: 5

first previous 1 2 3 4 5 ... 15 next last

Check/Uncheck all

---

STRUCTURE OF CAN\_318  
PDB ID: 5F7L

---

STRUCTURE OF CAN\_319  
PDB ID: 5DA0

---

STRUCTURE OF CAN\_320  
PDB ID: 4W6W

---

STRUCTURE OF CAN\_321  
PDB ID: 4W6X

---

STRUCTURE OF CAN\_322  
PDB ID: 4W6Y

a

**iCAN**  
Institute Collection & Analysis of Nanobody

Home Search Analysis Submit Structure Prediction Help About Us

**Submit**

Please upload your sequences in fasta format. You can paste in the text area or select a file to upload.

or:  No file selected

---

\*Name

\*Institution/Company

\*email

---

\*Antigen information

\*Sequence Information

DNA  Protein

Full length nanobody

CDR1  CDR2  CDR3

Others

e.g. "plasmid", please enter detailed information about plasmid such as name, restriction enzyme cutting site.

Function

Publication

Patent

Bacteria

Species

b
