# Supplementary material for: Institute collection and analysis of Nanobodies (iCAN): a comprehensive database and analysis platform for nanobodies
Source: PubMed Central journal article supplement (PMC5646159; doi:10.1186/s12864-017-4204-6), 2017-10-17

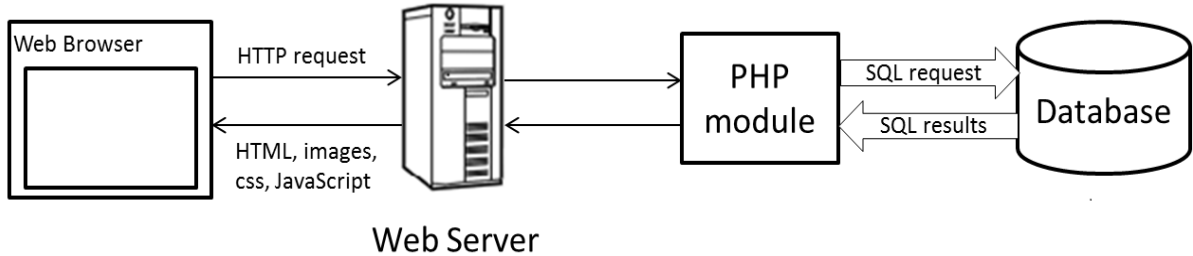

Supplement: 12864_2017_4204_MOESM3_ESM.pdf [file 12864_2017_4204_MOESM3_ESM.pdf]
